# Supplementary material
Source: PubMed Central journal article supplement (PMC4936363)
Supplement: IAI.00077-16_zii999091741so1.pdf [file IAI.00077-16_zii999091741so1.pdf]

## Supplement

**Table S1 Plasmids used in this study**

| <b>Plasmid</b>                   | <b>Description</b>                                                                                                                   | <b>Origin</b> |
|----------------------------------|--------------------------------------------------------------------------------------------------------------------------------------|---------------|
| pSAG1-CAS9-U6gRNA<br>(UPRT)      | Vector expressing CRISPR/Cas9 fused to GFP. Used in mutagenesis to create NTPase I and NTPase II targeted CRISPR cutting constructs. | This study    |
| pHTN HALOTAG CMV- neo<br>plasmid | Vector for expression of GLUC used as backbone to clone in 5× GAS site sequence upstream of a mCMV promoter.                         | Promega       |

**Table S2 Primers used for QTL mapping analysis**

| <b>Primer</b> | <b>Direction</b> | <b>Sequence (5'-3')</b> | <b>Marker</b> |
|---------------|------------------|-------------------------|---------------|
| M163-1F*      | forward          | GCTTTTGACGTCCACTTCG     | M163          |
| M163-2R*      | reverse          | CCTCCTTCTCAAAGGTCAAGC   | M163          |
| BM17053-F*    | forward          | CGACAAGTCCATGCGAACTA    | BM1705        |
| BM17053-R*    | reverse          | GGCAACAGGAGGTAGAGGAG    | BM1705        |
| 4B-fw         | forward          | ACGCATGCAGATCCGTCCTC    | 4B            |
| 4B-rev        | reverse          | GAGCTTCTCTTCCGAGCAACG   | 4B            |
| 4C-fw         | forward          | AGCTCGCATCATATCGCCGTC   | 4C            |
| 4C-rev        | reverse          | TAGAAACGAGTGAGGGACACTG  | 4C            |
| 5-fw          | forward          | GATACTCCAAACTGCGGAGGC   | 5             |
| 5-rev         | reverse          | TGGAATGCATGTGCCGAGTTCG  | 5             |
| MIC5-F*       | forward          | GCGGTGGTCAGATTCCTCTA    | MIC5          |
| MIC5-R*       | reverse          | GCCCAGTGTGCATAGCAAAT    | MIC5          |
| 9-fw          | forward          | TCCTGATGGATAAACACTACGAG | 9             |
| 9-rev         | reverse          | TCTTCATCGCCTTCAAGTCGAG  | 9             |

\*Su C1, Howe DK, Dubey JP, Ajioka JW, Sibley LD. 2002. Identification of quantitative trait loci controlling acute virulence in *Toxoplasma gondii*. Proc Natl Acad Sci U S A. 99:10753-8.

**Table S3 Primes used for generating NTPase knockouts**

| Experiment                | Primer | Direction | Sequence                                  | Plasmid or purpose                   |
|---------------------------|--------|-----------|-------------------------------------------|--------------------------------------|
| NTPase I<br>CRISPR        | A44    | forward   | GGCGCTGGCAAGCGGTTTCGCGTTTTAGAGCTAGAAATAGC | pSAG1-CAS9-<br>U6gRNA (NTPase I)     |
| NTPase II<br>CRISPR       | A45    | forward   | CGCGAGGGTAAACGGTTCACGTTTTAGAGCTAGAAATAGC  | pSAG1-CAS9-<br>U6gRNA (NTPase II)    |
| NTPase I and<br>II CRISPR | F4     | reverse   | AACTTGACATCCCCATTTAC                      |                                      |
| Diagnostic<br>PCR         |        |           |                                           |                                      |
|                           | A34    | forward   | ATGTGCCTCTCTTGCTGGTGT                     | 5'-DHFR drug marker<br>integration   |
|                           | A35    | reverse   | GCACGGCAGTCAGATAACAG                      | 5'-DHFR drug marker<br>integration   |
|                           | A38    | forward   | TGCATCATGTATCAGCGGTCCG                    | 3'-DHFR drug marker<br>integration   |
|                           | A39    | reverse   | CGTGTCTTCTTCCAAGAGTTGC                    | 3'-DHFR drug marker<br>integration   |
|                           | A47    | forward   | ATGCAGGCAGTAGTTCGACGAG                    | NTPase II integrity                  |
|                           | A48    | reverse   | ATCGCCGCTAGCATACTCCG                      | Pseudogene integrity                 |
|                           | A49    | reverse   | GCAAGCATCTCTCGTCCCCTTATA                  | NTPase II integrity                  |
|                           | A52    | forward   | ATGACGTCCTACCGCTAGTTGC                    | Pseudogene integrity                 |
|                           | A66    | forward   | AAGTCCTACCAGAACGACAACAGC                  | 3'-HXGPRT drug<br>marker integration |
|                           | A70    | reverse   | GCTGTTGTCGTTCTGGTAGGACTT                  | 5'-HXGPRT drug<br>marker integration |
